# Supplementary material for: Efficient detection of Al3+ and B4O72− over trigonal prism In(iii) complex
Source: Royal Society of Chemistry journal article supplement (doi:10.1039/d3ce00904a), 2023-01-01
Supplement: d3ce00904a1.pdf [file d3ce00904a1.pdf]

## Efficient detection of $\text{Al}^{3+}$ and $\text{B}_4\text{O}_7^{2-}$ over trigonal prism $\text{In}(\text{III})$ complex

Rui Wang,<sup>a</sup> Nan Jiang,<sup>a</sup> Rong Luo,<sup>a</sup> Hai-Jun Yu,<sup>a</sup> Yi Yin,<sup>a</sup> Shuang-Yu Bi,<sup>b</sup> Dong-Mei Zhang,<sup>a</sup> and Feng Shao<sup>\*a</sup>

<sup>a</sup>Key Laboratory of Marine Chemistry Theory and Technology, Ministry of Education, College of Chemistry and Chemical Engineering, Ocean University of China, Qingdao 266100, China

<sup>b</sup>State Key Laboratory of Microbial Technology, Shandong University, Qingdao 266237, China

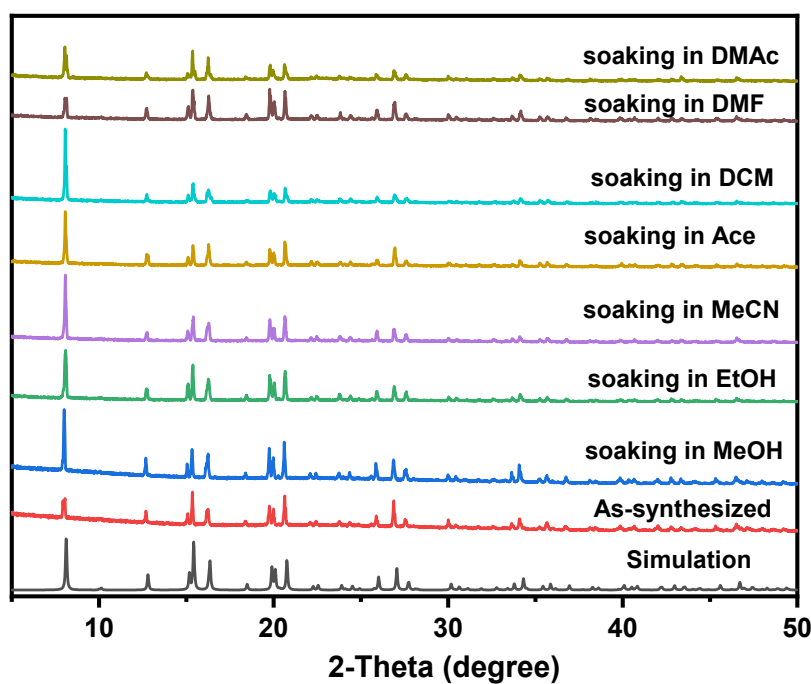

**Fig. S1** The Powder X-ray diffraction patterns of **1** immersing in common solvents: methanol (MeOH), *N,N*-dimethylformamide (DMF), *N,N*-dimethylacetamide (DMAc), ethanol (EtOH), acetonitrile (MeCN), dichloromethane (DCM) and acetone (Ace) for 24 h.

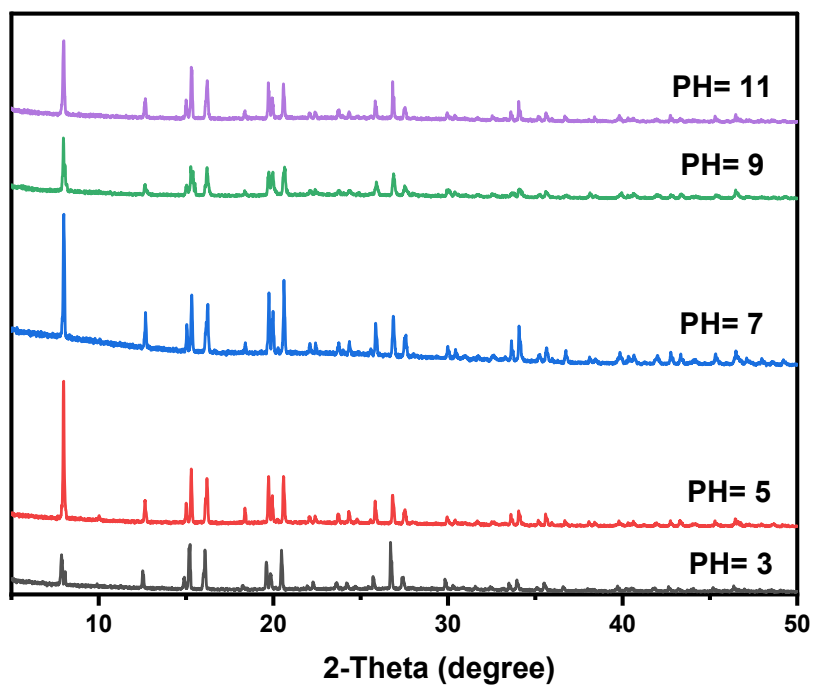

**Fig. S2** The Powder X-ray diffraction patterns of **1** immersing in MeOH in different PH values.

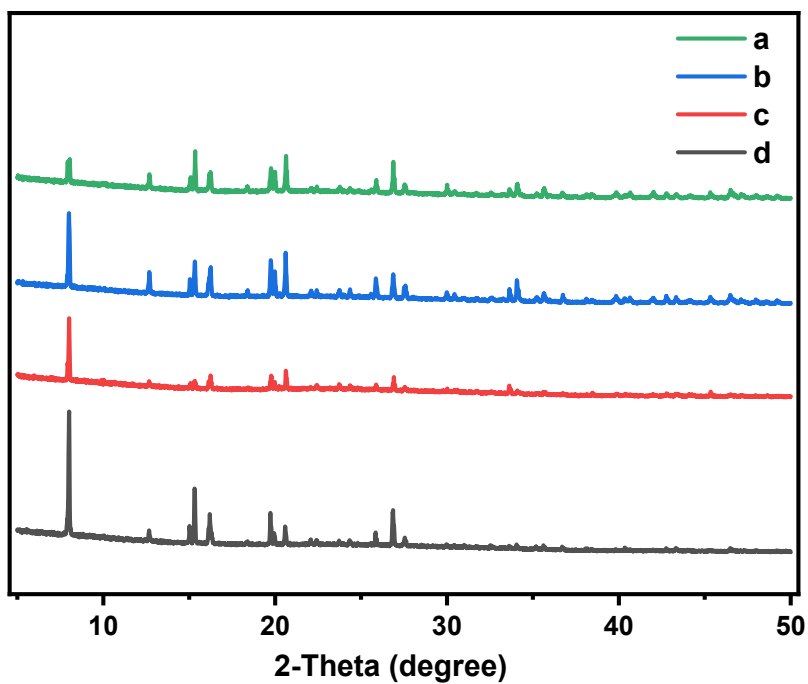

**Fig. S3** The PXRD patterns of (a) as-synthesized. (b) **1** after soaked in MeOH for 48 h. (c) **1** after ultrasonic sound in MeOH containing  $\text{Al}^{3+}$  ( $10^{-3}$  M) for 25 min. (d) **1** after ultrasonic sound in MeOH containing  $\text{B}_4\text{O}_7^{2-}$  ( $10^{-3}$  M) for 25 min.

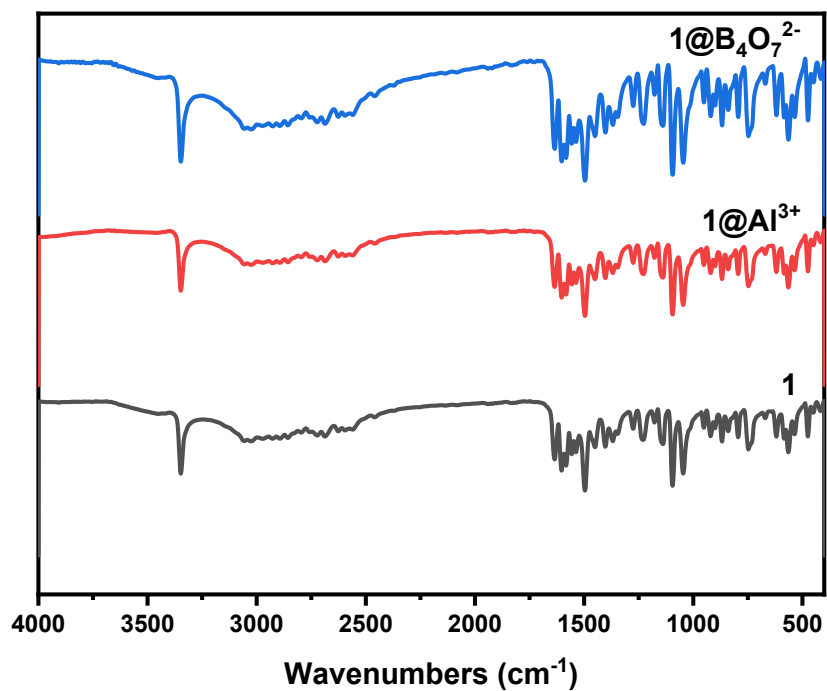

Fig. S4 The FT-IR spectra of **1** before and after being ultrasonic in MeOH containing Al<sup>3+</sup> and B<sub>4</sub>O<sub>7</sub><sup>2-</sup>.

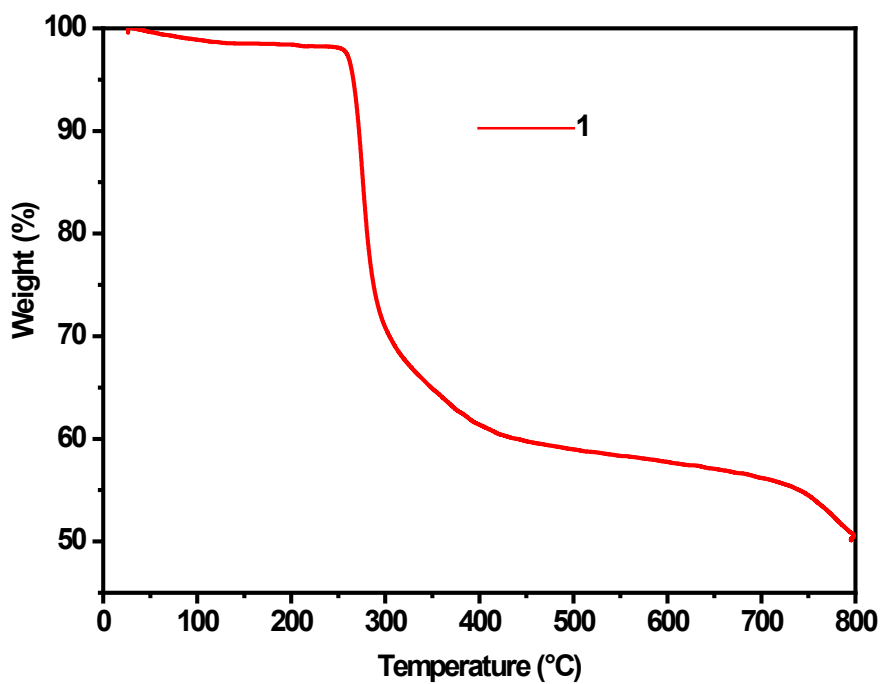

Fig. S5 TGA plot of **1** under N<sub>2</sub> condition.

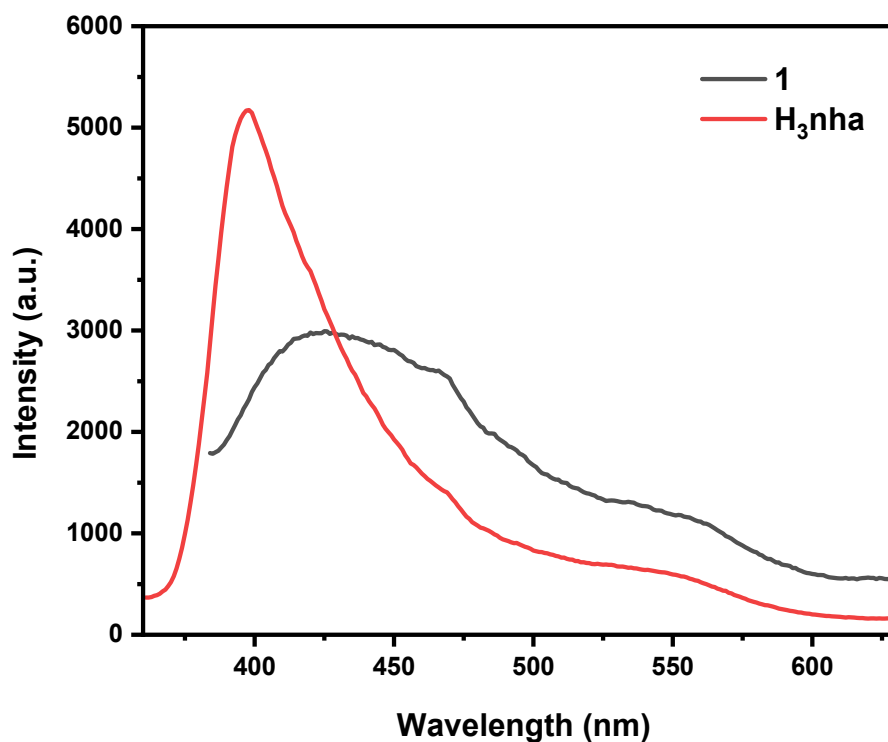

**Fig. S6** Solid state luminescence spectra of H<sub>3</sub>nha ( $\lambda_{ex}$ =325 nm,) and **1** ( $\lambda_{ex}$ =330 nm)

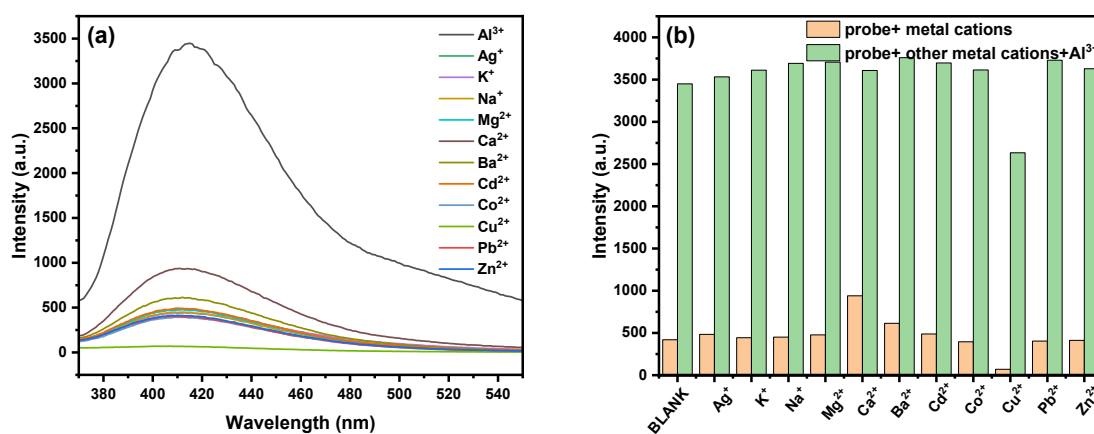

**Fig. S7** (a) Luminescence spectra of H<sub>3</sub>nha ( $10^{-4}$  M) in MeOH upon the addition of different metal ions; (b) Luminescence intensities at 325 nm of H<sub>3</sub>nha ( $10^{-4}$  M) in MeOH in the presence of only Al<sup>3+</sup> ( $10^{-3}$  M) and Al<sup>3+</sup> with the other metal ions ( $10^{-3}$  M).

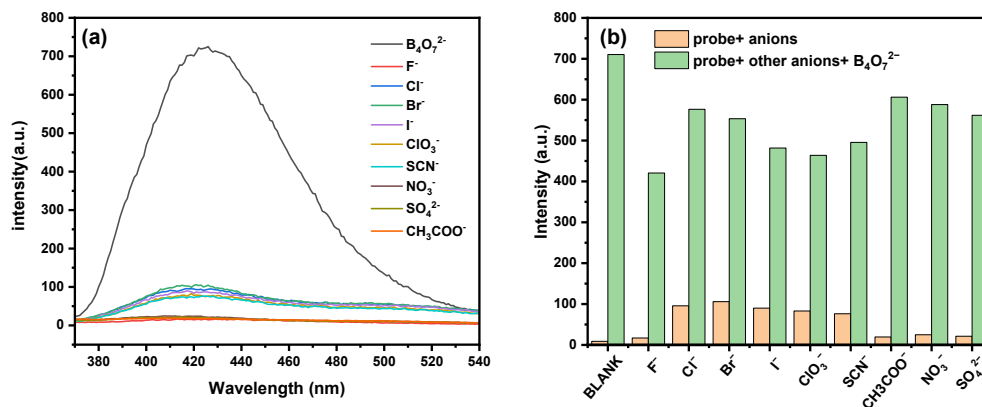

**Fig. S8** (a) Luminescence spectra of  $H_3nha$  ( $10^{-4}$  M) in solution (MeOH:H<sub>2</sub>O, v/v =9:1) upon the addition of different non-metal anions; (b) Luminescence intensities at 325 nm of  $H_3nha$  ( $10^{-4}$  M) in solution (MeOH:H<sub>2</sub>O, v/v = 9:1) in the presence of only  $B_4O_7^{2-}$  ( $10^{-3}$  M) and  $B_4O_7^{2-}$  with the other anions ( $10^{-3}$  M).

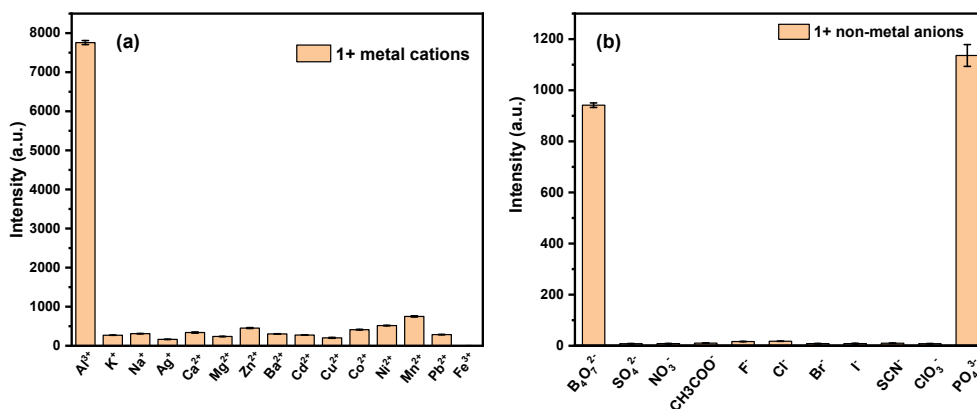

**Fig. S9** Luminescence spectra of **1** in MeOH upon the addition of (a) different metal ions and (b) different non-metal anions;

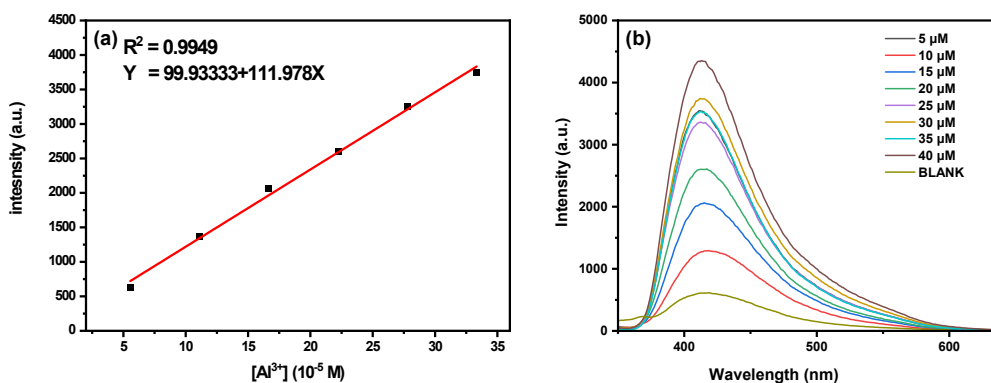

**Fig. S10** (a) Linear relationship of the luminescence intensity at 330 nm of **1** with the concentration of  $Al^{3+}$ . (b) The luminescence spectra of **1** in MeOH with different concentration of  $Al^{3+}$ .

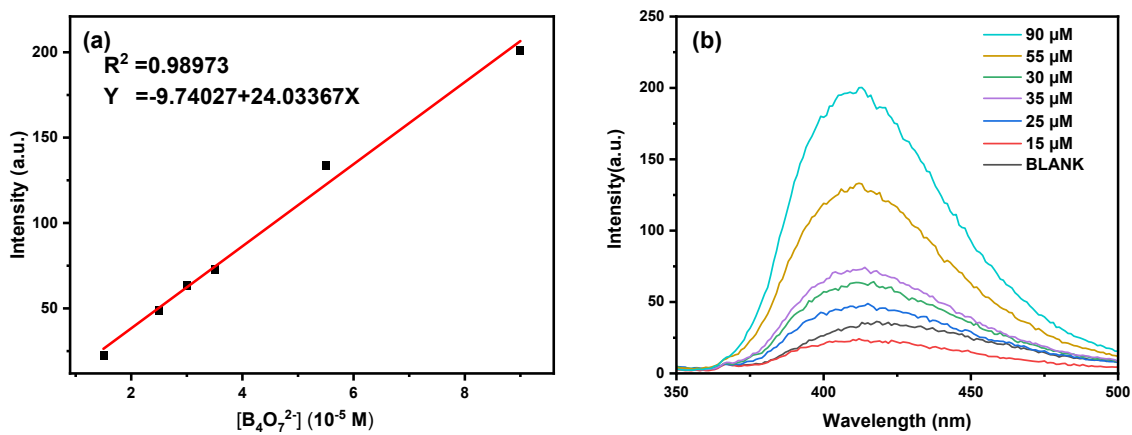

**Fig.S11** (a) The luminescence spectra of **1** in solution (MeOH:H<sub>2</sub>O, v/v =9:1) with different concentration of B<sub>4</sub>O<sub>7</sub><sup>2-</sup> (b) Linear relationship of the luminescence intensity at 330 nm of **1** with the concentration of B<sub>4</sub>O<sub>7</sub><sup>2-</sup>.

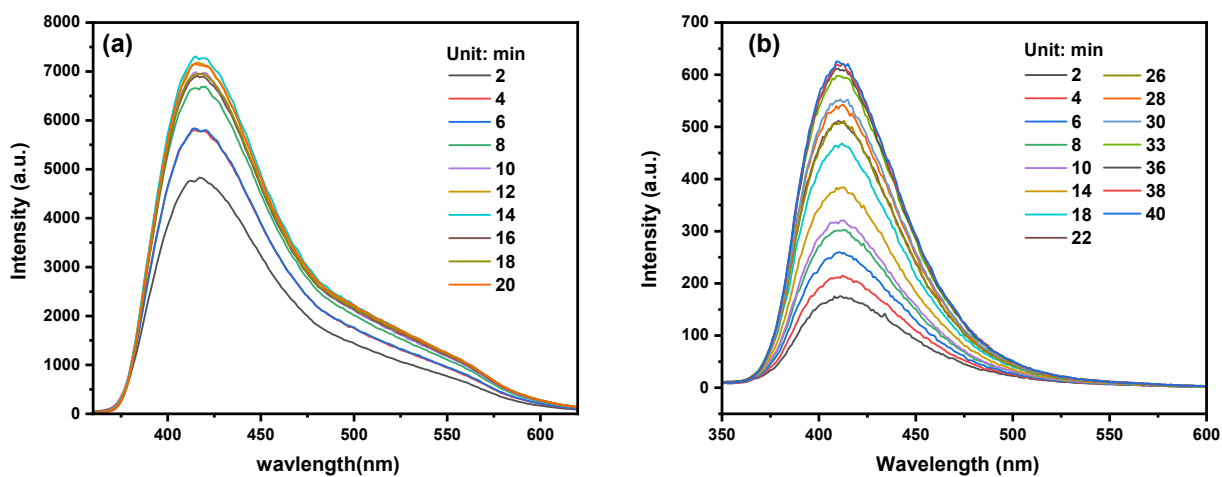

**Fig.S12** The luminescence intensity of (a) **1**@Al<sup>3+</sup> and (b) **1**@B<sub>4</sub>O<sub>7</sub><sup>2-</sup> with the increase of time.

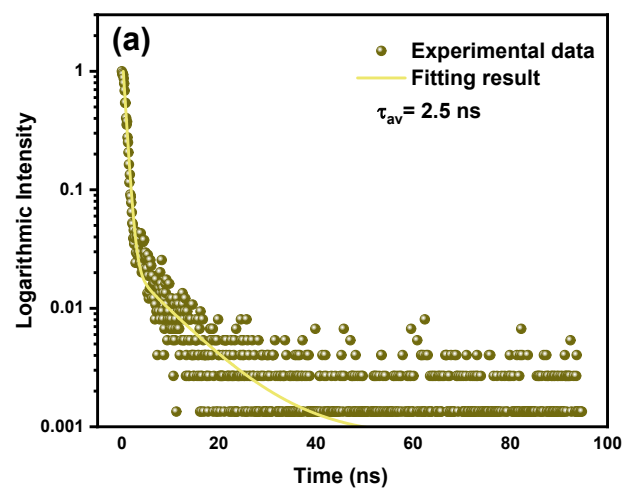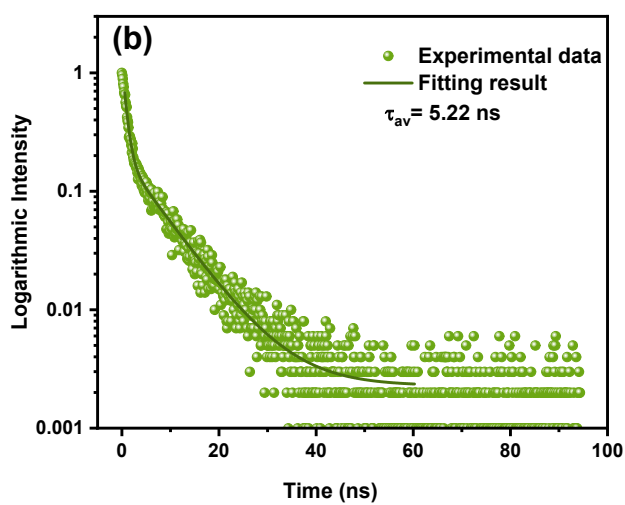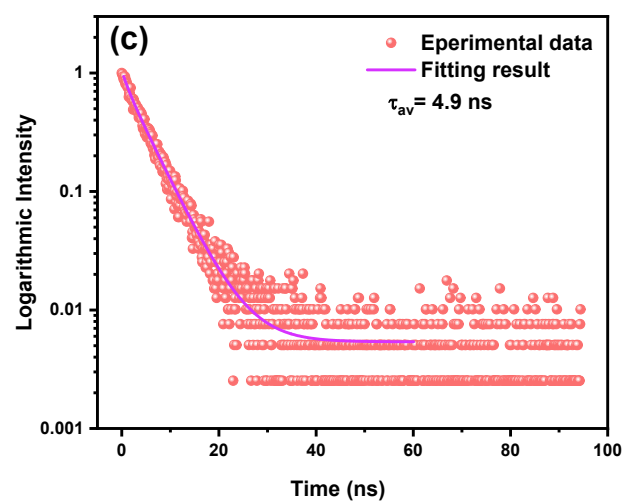

**Fig. S13** The time resolved luminescence decay corresponding fitted lines of **1** (a) in MeOH, (b) **1**@Al<sup>3+</sup>, (c) **1**@B<sub>4</sub>O<sub>7</sub><sup>2-</sup>.

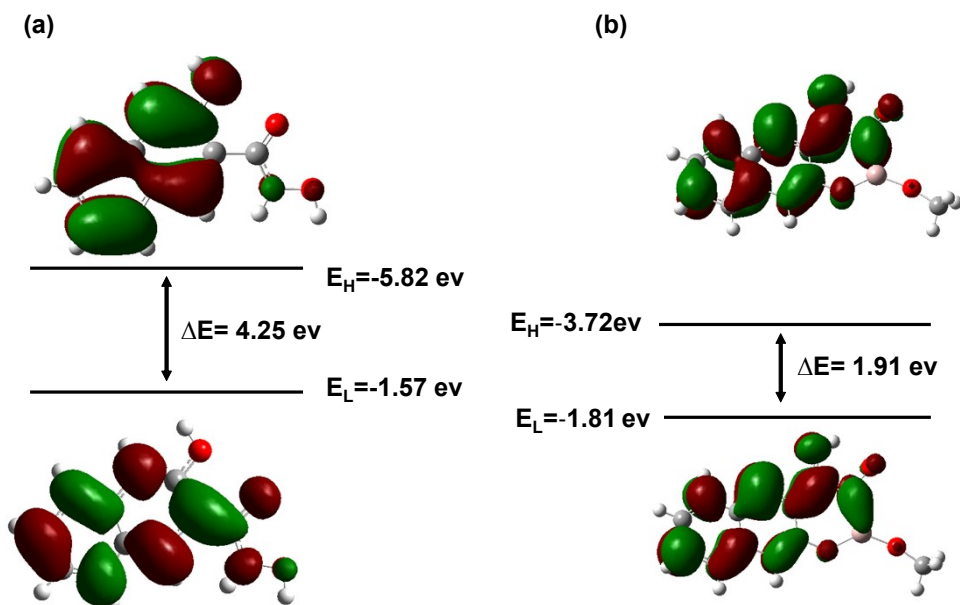

Fig. S14 HOMO and LUMO energies for 1 and 1@Al<sup>3+</sup>.

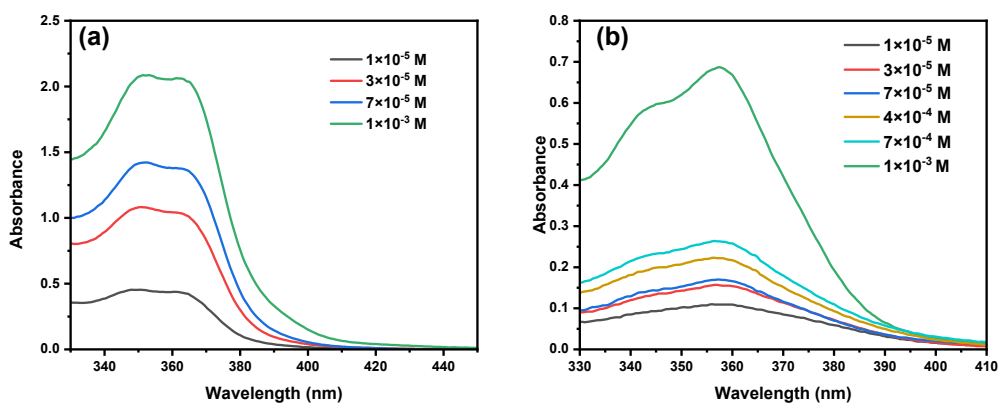

Fig. S15 The absorption spectra of 1 by addition of different concentrations of (a) Al<sup>3+</sup> and (b) B<sub>4</sub>O<sub>7</sub><sup>2-</sup>.

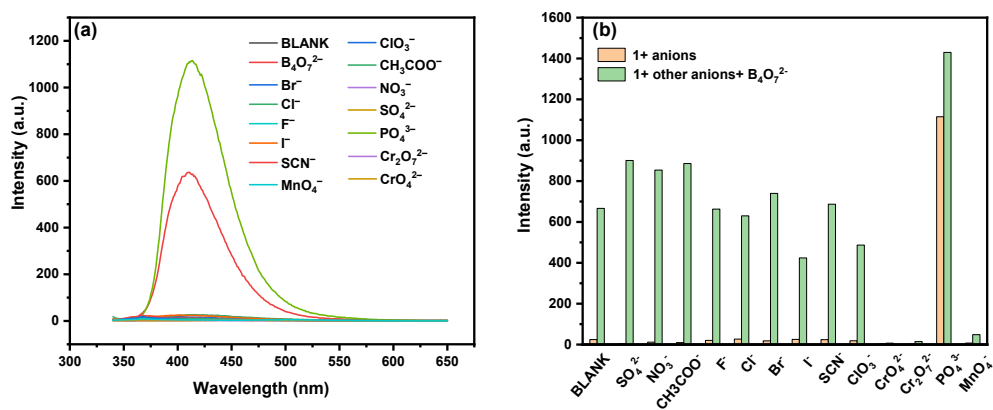

Fig. S16 (a) Luminescence spectra of 1 in solvent (MeOH:H<sub>2</sub>O, v/v = 9:1) upon the addition of different non-metal anions; (b) Luminescence intensities at 330 nm of 1 in the presence of only B<sub>4</sub>O<sub>7</sub><sup>2-</sup> (10<sup>-3</sup> M) and B<sub>4</sub>O<sub>7</sub><sup>2-</sup> with the other non-metal anions (10<sup>-3</sup> M).



**Table S1** The continuous shape measures value calculated using SHAPE 2.1.

| Complex | HP( $D_{6h}$ ) | PPY( $C_{5v}$ ) | OC( $O_h$ ) | TPR( $D_{3h}$ ) | JPPY ( $C_{5v}$ ) |
|---------|----------------|-----------------|-------------|-----------------|-------------------|
| 1       | 35.956         | 19.726          | 5.131       | 4.439           | 23.839            |

**Table S2** Selected bond lengths (Å) for **1**.

| Selected bond lengths |            |
|-----------------------|------------|
| In(1)–O(1)            | 2.1540(19) |
| In(1)–O(2)            | 2.132(2)   |
| N(1)–O(1)             | 1.372(3)   |
| C(1)–O(2)             | 1.268(3)   |
| C(1)–N(1)             | 1.315(3)   |

**Table S3** Comparison of various sensors for the detection of  $Al^{3+}$  and  $B_4O_7^{2-}$ .

|   | Complex                                                              | Sensing type | Identification substance | LOD           | Reference |
|---|----------------------------------------------------------------------|--------------|--------------------------|---------------|-----------|
| 1 | A-curcumin@MOF-5                                                     | Turn-on      | $Al^{3+}$                | 3.10 $\mu M$  | 1         |
| 2 | B-curcumin@MOF-5                                                     | Turn-on      | $Al^{3+}$                | 2.84 $\mu M$  | 1         |
| 3 | $Eu^{3+}@UiO-66-(COOH)_2/OH$                                         | Turn-off     | $Al^{3+}$                | 0.36 $\mu M$  | 2         |
| 4 | $[Zn(ICA)_2(DMF)(H_2O)_3]$                                           | Turn-on      | $Al^{3+}$                | 0.607 $\mu M$ | 3         |
| 5 | $\{[Cd(2-amino-1,4-benzenedicarboxylate)(4,4'azopyridine)](DMA)\}_n$ | Turn-on      | $Al^{3+}$                | 0.38 $\mu M$  | 4         |
| 6 | $\{[Zn_2(NDC)_2(4bppyttz)]1.5DMF\}$                                  | Turn-on      | $Al^{3+}$                | 2.9 $\mu M$   | 5         |
| 7 | $In(H_2nha)_3$                                                       | Turn-on      | $Al^{3+}$                | 1.3 $\mu M$   | This work |
| 8 | $\{[Tb(dppa)(H_2O)_2]dima H_2O \cdot 0.5O\}_n$                       | Turn-on      | $B_4O_7^{2-}$            | 1.49 $\mu M$  | 6         |
| 9 | $In(H_2nha)_3$                                                       | Turn-on      | $B_4O_7^{2-}$            | 6.2 $\mu M$   | This work |

**Table S4** Various sensors for the detection of  $B_4O_7^{2-}$ .

|   | Fluorescent sensor                                                                  | Sensing type | The detected anions                                                                                                                                                                                                                               | Ref |
|---|-------------------------------------------------------------------------------------|--------------|---------------------------------------------------------------------------------------------------------------------------------------------------------------------------------------------------------------------------------------------------|-----|
| 1 | $\{[Tb(dppa)(H_2O)_2] \cdot dima \cdot H_2O \cdot 0.5O\}_n$                         | Turn-on      | $B_4O_7^{2-}$ , $HSO_3^-$ , $CO_3^{2-}$ , $CH_3COO^-$ , $HCO_3^-$ , $S_2O_3^{2-}$ , $I^-$ , $S^{2-}$ , $C_2O_4^{2-}$ , $Br^-$ , $Cl^-$ , $SO_4^{2-}$ , $NO_2^-$ , $CrO_4^{2-}$ , $Cr_2O_7^{2-}$                                                   | 6   |
| 2 | 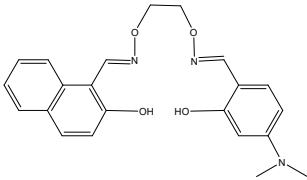   | Turn-on      | $F^-$ , $Cl^-$ , $Br^-$ , $I^-$ , $HSO_4^-$ , $S^{2-}$ , $SO_3^{2-}$ , $SO_4^{2-}$ , $CO_3^{2-}$ , $HCO_3^-$ , $CN^-$ , $HPO_4^{2-}$ , $H_2PO_4^-$ , $P_2O_7^{2-}$ , $B_4O_7^{2-}$ , $CH_3COO^-$ , $ClO_4^-$                                      | 7   |
| 3 |    | Turn-off     | $F^-$ , $Cl^-$ , $Br^-$ , $I^-$ , $HPO_4^{2-}$ , $H_2PO_4^-$ , $P_2O_7^{4-}$ , $S^{2-}$ , $CH_3COO^-$ , $SO_4^{2-}$ , $CO_3^{2-}$ , $HCO_3^-$ , $CN^-$ , $ClO_4^-$ , $B_4O_7^{2-}$                                                                | 8   |
| 4 |   | Turn-on      | $B_4O_7^{2-}$ , $Cl^-$ , $ClO_4^-$ , $CN^-$ , $CO_3^{2-}$ , $H_2PO_4^-$ , $HPO_4^{2-}$ , $HS^-$ , $I^-$ , $NO_2^-$ , $NO_3^-$ , $CH_3COO^-$ , $P_2O_7^{4-}$ , $F^-$ , $S^{2-}$ , $Br^-$ , $HCO_3^-$                                               | 9   |
| 5 |  | Turn-off     | $F^-$ , $Cl^-$ , $Br^-$ , $I^-$ , $ClO_4^-$ , $S^{2-}$ , $HS^-$ , $SO_3^{2-}$ , $S_2O_8^{2-}$ , $CO_3^{2-}$ , $SO_4^{2-}$ , $HCO_3^-$ , $CN^-$ , $SCN^-$ , $CH_3COO^-$ , $Ppi$ , $H_2PO_4^-$ , $HPO_4^{2-}$ , $NO_2^-$ , $NO_3^-$ , $B_4O_7^{2-}$ | 10  |
| 6 |  | Turn-on      | $F^-$ , $Cl^-$ , $Br^-$ , $I^-$ , $ClO_4^-$ , $H_2PO_4^-$ , $CN^-$ , $SiO_3^{2-}$ , $CH_3COO^-$ , $B_4O_7^{2-}$ , $HS^-$ , $S^{2-}$ , $NO_3^-$ , $CO_3^{2-}$ , $HCO_3^-$ , $HPO_4^-$ , $P_2O_7^{4-}$ , $NO_2^-$                                   | 11  |
| 7 |  | Turn-on      | $F^-$ , $Cl^-$ , $Br^-$ , $I^-$ , $HPO_4^-$ , $H_2PO_4^-$ , $P_2O_7^{4-}$ , $S^{2-}$ , $CH_3COO^-$ , $CO_3^{2-}$ , $HCO_3^-$ , $CN^-$ , $ClO_4^-$ , $HS^-$ , $NO_2^-$ , $NO_3^-$ , $B_4O_7^{2-}$                                                  | 12  |
| 8 |  | Turn-on      | $B_4O_7^{2-}$ , $SO_4^{2-}$ , $PO_4^{3-}$ , $NO_3^-$ , $NO_2^-$ , $P_2O_7^{2-}$ , $H_2PO_4^-$ , $F^-$ , $CH_3COO^-$ , $Br^-$ , $HCO_3^-$                                                                                                          | 13  |

1. T. Zhong, D. Li, C. Li, Z. Zhang and G. Wang, *Anal. Methods*, 2022, **14**, 2714-2722.
2. Y.-F. Xia, G.-M. Bao, X.-X. Peng, X.-Y. Wu, H.-F. Lu, Y.-F. Zhong, W. Li, J.-X. He, S.-Y. Liu, Q. Fan, S.-H. Li, W. Xiao and H.-Q. Yuan, *Anal. Chim. Acta*, 2022, **1221**, 340115.
3. Z. Zhang, T. Zhong and G. Wang, *J. Photochem. Photobiol., A*, 2022, **431**, 114052.
4. R. Debnath, R. Bhowmick, P. Ghosh, S. Biswas and S. Koner, *New J. Chem.*, 2022, **46**, 8523-8533.
5. X.-C. Huang, Y.-X. Jiang, Z.-J. Han, W. Yong, Q.-X. Huang, W.-X. Shi, X.-R. Chen, J.-J. Kong and H. Wu, *J. Mol. Struct.*, 2023, **1289**, 135897.
6. X.-L. Chen, L. Shang, L. Liu, H. Yang, H.-L. Cui and J.-J. Wang, *Dyes Pigm.*, 2021, **196**, 109809.
7. Y. Huang, Y.-F. Ding, Y.-R. Zheng, Y.-X. Sun and W.-K. Dong, *J. Mol. Struct.*, 2023, **1292**, 136132.
8. X. Xu, Y. J. Li, T. Feng, W. K. Dong and Y. J. Ding, *Luminescence*, 2021, **36**, 169-179.
9. J.-F. Wang, R.-N. Bian, T. Feng, K.-F. Xie, L. Wang and Y.-J. Ding, *Microchem. J.*, 2021, **160**, 105676.
10. W. Guo, T. Ji, Y. Ma, H. Song, J. Liu and W. Dong, *J. Mol. Struct.*, 2023, **1285**, 135545.
11. L.-M. Pu, L. Wang, Z.-L. Wei, Z.-Z. Chen, H.-T. Long, J.-X. Ru and X.-Y. Dong, *Spectrochim. Acta, Part A*, 2021, **249**, 119263.
12. X. Xu, R.-N. Bian, S.-Z. Guo, W.-K. Dong and Y.-J. Ding, *Inorg. Chim. Acta*, 2020, **513**, 119945.
13. Y. Chen, L. Jin, W. Wang, L. Dai, X. Tan and Q. Wang, *ChemistrySelect*, 2019, **4**, 2379-2382.
